## **Neurexins in serotonergic neurons regulate serotonin transmission and complex mouse behaviors**

**Amy Cheung<sup>1-3</sup>, Aya Matsui<sup>4</sup>, Manabu Abe<sup>5</sup>, Kenji Sakimura<sup>5</sup>, Toshikuni Sasaoka<sup>6</sup>, Takeshi Uemura<sup>7,8</sup>, Yuka Imamura Kawasawa<sup>9</sup> and Kensuke Futai<sup>1,2\*</sup>**

1. Department of Neurobiology, University of Massachusetts Chan Medical School, 364 Plantation Street, Worcester, MA 01605-2324, USA
2. Brudnick Neuropsychiatric Research Institute, University of Massachusetts Chan Medical School, 364 Plantation Street, Worcester, MA 01605-2324, USA
3. Medical Scientist Training Program, University of Massachusetts Chan Medical School, 364 Plantation Street, Worcester, MA 01605-2324, USA
4. Vollum Institute, Oregon Health & Science University, 3181 SW Sam Jackson Park Road, Portland, OR, 97239-3098, USA
5. Department of Animal Model Development, Brain Research Institute, Niigata University, Niigata 951-8585, Japan
6. Department of Comparative and Experimental Medicine, Brain Research Institute, Niigata University, Niigata 951-8585, Japan
7. Division of Gene Research, Research Center for Advanced Science, Shinshu University, Nagano 390-8621, Japan
8. Institute for Biomedical Sciences, Interdisciplinary Cluster for Cutting Edge Research, Shinshu University, Nagano 390-8621, Japan
9. Departments of Pharmacology and Biochemistry and Molecular Biology, Institute for Personalized Medicine, Pennsylvania State University College of Medicine, 500 University Drive, Hershey, PA 17033, USA

\* Corresponding author: [Kensuke.Futai@umassmed.edu](mailto:Kensuke.Futai@umassmed.edu)  
Tel: 1-774-455-4318

25 Text Pages with 4 Figures, 1 Table and 3 Supplemental Figures  
Number of Words: Abstract 168

### **Key Words:**

neurexin, serotonin, serotonin transporter, serotonergic transmission, raphe nuclei, hippocampus, social behavior, mouse

## **Abstract**

Extensive serotonin (5-HT) innervation throughout the brain corroborates 5-HT's modulatory role in numerous cognitive activities. Volume transmission is the major mode for 5-HT transmission but mechanisms underlying 5-HT signaling are still largely unknown. Abnormal brain 5-HT levels and function have been implicated in autism spectrum disorder (ASD). Neurexin (Nrxn) genes encode presynaptic cell adhesion molecules important for the regulation of synaptic neurotransmitter release, notably glutamatergic and GABAergic transmission. Mutations in Nrxn genes are associated with neurodevelopmental disorders including ASD. However, the role of Nrxn genes in the 5-HT system is poorly understood. Here, we generated a mouse model with all three Nrxn genes disrupted specifically in 5-HT neurons to study how Nrxns affect 5-HT transmission. Loss of Nrxns in 5-HT neurons impaired 5-HT release in the dorsal raphe nucleus and dorsal hippocampus and decreased serotonin transporter distribution in specific brain areas. Furthermore, 5-HT neuron-specific Nrxn knockout reduced sociability and increased depressive-like behavior. Our results highlight functional roles for Nrxns in 5-HT neurotransmission and the execution of complex behaviors.

## Introduction

Serotonin (5-hydroxytryptamine, 5-HT) neurons in the raphe nuclei project their axons throughout the brain and modulate social interactions, stress responses, and valence among other processes. Abnormalities in 5-HT signaling have been extensively reported in neuropsychiatric disorders including depression, anxiety disorders, schizophrenia (SCZ), and autism spectrum disorder (ASD) (Lesch & Waider, 2012). 5-HT reaches postsynaptic specializations through volume transmission or at synapses and synaptic triads (Belmer, Klenowski, Patkar, & Bartlett, 2017). While much work has focused on deciphering receptor and reuptake dynamics in 5-HT signaling, the functional component important for 5-HT release remains undefined.

Nrxn genes (*Nrxn1-3*) encode alpha-, beta-, and gamma- ( $\alpha/\beta$ *Nrxn1-3*,  $\gamma$ *Nrxn1*) isoforms, and regulate synapse specification and function (Sudhof, 2017). Copy number variations and mutations in Nrxns are associated with ASD and SCZ (Sudhof, 2017). Numerous studies of  $\alpha$  and  $\beta$ Nrxn KO mice demonstrate impaired excitatory and inhibitory synaptic transmission (Sudhof, 2017). While Nrxns regulate fast synaptic transmission, no studies have examined the role of Nrxns in central neuromodulatory systems like the 5-HT system. Therefore, elucidating the impact of Nrxns in 5-HT transmission will allow a better understanding of pathophysiological mechanisms underlying neuropsychiatric disorders.

In this study, we investigated the functions of Nrxns in the 5-HT system by assessing signaling properties and behavior in 5-HT neuron-specific Nrxn triple knockout (TKO) mice. We demonstrated that the loss of Nrxn genes reduced 5-HT release and serotonin transporter (SERT)-labeled 5-HT fibers in the mouse brain. Moreover, the lack of Nrxns in 5-HT neurons altered social behavior and depressive-like phenotypes. Our findings highlight Nrxns as functional regulators of neurotransmission and complex behaviors in the 5-HT system.

## Results

### Expression of *Nrxn* isoforms in 5-HT neurons and validation of the *Fev/RFP/NrxnTKO* mouse line

To characterize *Nrxn* genes expressed in 5-HT neurons, we analyzed scRNAseq data from a published database consisting of over 900 single-cell 5-HT neuron datasets (~1 million reads/cell) which generated 11 different 5-HT neuron clusters from the principal dorsal raphe nucleus (DRN), caudal DRN (cDRN), and median raphe nucleus (MRN) (**Figure 1A**)(**Figure 1-Meta data Supplement 1**) (Ren et al., 2019). Transcriptional expression of six *Nrxn* isoforms ( $\alpha$ -,  $\beta$ *Nrxn*1/2/3) in 11 clusters indicated that all 5-HT neuron clusters express at least one  $\alpha$ - and  $\beta$ *Nrxn* isoform (**Figure 1B, C**). These results suggest that *Nrxn* proteins are expressed in 5-HT neurons in all RN regions.

To test the roles of *Nrxns* in 5-HT neurons, we generated 5-HT neuron-specific *Nrxn* triple knockout (TKO) mice by crossing *Fev-cre*, an ETS family transcription factor promoting 5-HT neuron-specific *Cre* expression, tdTomato reporter, and triple *Nrxn*1/2/3 floxed lines (*Fev/RFP/NrxnTKO*) (Scott et al., 2005; T. Uemura et al., 2021; T. Uemura, Suzuki, E., Koike, R., Kawase, S., Kurihara, T., Sakimura, K., Mishina, M., Tabuchi, K., 2017). *Cre*-negative littermates and *Fev/RFP* mice were used as WT controls. The specific deletion of *Nrxns* in 5-HT neurons was confirmed by single-cell RT-qPCR (**Figure 1D**). The *Fev/RFP/NrxnTKO* line was fertile and viable and did not demonstrate obvious differences in gross appearance.

### Reduced 5-HT release in *Fev/RFP/NrxnTKO* mice

While numerous studies indicate that *Nrxns* regulate fast neurotransmitter release including that of glutamate and GABA, no studies have tested *Nrxn* function in central neuromodulatory systems. To directly examine the role of *Nrxn* on 5-HT release, we measured 5-HT transients in the DRN and hippocampus using fast-scan cyclic voltammetry (FSCV) (**Figure 2**). 5-HT release was recorded with a voltage ramp delivered through carbon-fiber electrodes (**Figure 2A**). Current-voltage (CV) plots displayed



the expected currents for 5-HT oxidation and reduction peak potentials, indicating specificity for 5-HT (**Figure 2B**).

5-HT transients were recorded in the DRN where 5-HT neurons are highly clustered in WT and Fev/RFP/NrxnTKO mice (**Figure 2C-F**). Electrical stimulation was applied at two different stimulus strengths to evoke 5-HT release in acute brain slices containing the DRN. To confirm that electrically evoked FSCV transients were mediated by 5-HT release, the selective serotonin reuptake inhibitor fluoxetine (FLX) and action potential inhibiting sodium channel blocker tetrodotoxin (TTX) were applied (**Figure 2C, D, F**) (Carboni & Di Chiara, 1989). Importantly, 5-HT peak amplitude was significantly reduced in Fev/RFP/NrxnTKO mice (**Figure 2E**). FLX caused a similar increase in 5-HT transient area in each genotype, indicating that Nrxn TKO did not change transporter activity (**Figure 2F**). Next, we performed FSCV recordings in the dorsal hippocampal CA3 region to determine whether differences in 5-HT release could be detected in a distal region receiving 5-HT fiber projections (**Figure 2G-J**). We observed robust suppression of 5-HT currents in Fev/RFP/NrxnTKO mice and no genotype-specific differences in response to FLX. Taken together, these findings indicate that Nrxns are important for 5-HT release.

### **Reduced 5-HT fiber density in Fev/NrxnTKO/RFP mice**

Next, we analyzed whether Nrxns are important for 5-HT innervation in brain regions that receive 5-HT projections by analyzing SERT-positive fibers (**Figure 3**) (Awasthi, Tamada, Overton, & Takumi, 2021). We found that SERT fibers were reduced in the dorsal hippocampus and the DRN of Fev/RFP/NrxnTKO mice relative to controls. Interestingly, no differences were seen in the projections to the nucleus accumbens and vCA1 indicating that SERT inputs are not globally altered. These findings suggest that Nrxns selectively mediate SERT-positive fiber area depending on the innervated circuit. Although Nrxn TKO in cerebellar granule cells were found to cause cell death (T. Uemura et al., 2021), there were no changes in 5-HT neuron number in Fev/RFP/NrxnTKO mice indicating that reduced SERT fiber density is not due to the loss of 5-HT neurons (**Figure 3-Figure Supplement 1**).

### **Impaired social behavior in Fev/NrxnTKO/RFP mice**

We investigated the behavior of adult Fev/RFP/NrxnTKO mice in a variety of assays. Basic activities, evaluated by locomotor activity, rotarod performance, and open field, did not differ between Fev/RFP/NrxnTKO mice and Cre-negative controls (**Figure 4-Figure Supplement 1**). To examine the role of Nrxns in 5-HT system-related behavior, we next assessed social behavior. WT and Fev/RFP/NrxnTKO underwent a direct social interaction test to examine naturally occurring interactions between a subject mouse and a juvenile stimulus mouse. In trial 1, the stimulus mouse was unfamiliar to the subject mouse. After 24 hours, the subject mouse was re-exposed to the same stimulus mouse (trial 2) (**Figure 4A**). Social investigation was measured across both trials and as a reduction in time that the subject mouse spent investigating the stimulus mouse in trial 2. We found that Fev/RFP/NrxnTKO mice spent less time exploring the stimulus mouse in trial 1 (**Figure 4B**) and differed in their investigation of the stimulus mouse across trials (**Figure 4C**) compared with WT mice. These results suggest that Fev/RFP/NrxnTKO mice have deficits in sociability. Interestingly, one of the depression tests, the forced swim test but not tail suspension test, revealed increased immobility behavior in Fev/RFP/NrxnTKO compared with WT mice (**Figure 4D-E**). Importantly, other tests addressing learning and memory and repetitive behaviors displayed no abnormalities in Fev/RFP/NrxnTKO mice (**Figure 4-Figure Supplement 2**). These results demonstrate that the absence of Nrxns in 5-HT neurons impairs social behavior and moderately influences depression-related behavior.

### **Discussion**

Nrxns regulate the release of fast neurotransmitters such as glutamate and GABA by coupling  $Ca^{2+}$  channels to presynaptic release machinery (Sudhof, 2017). However, their roles in central neuromodulatory systems have never been addressed. Here we provide evidence that Nrxns control neuromodulatory 5-HT release. We found that the DRN and hippocampus displayed > 40% reduction in 5-HT release in Fev/RFP/NrxnTKO mice. Fev expression begins in the embryonic stage (Scott et al.,

2005), therefore the impact of Nrnx TKO during development should be noted. However, compared with the robust functional deficit observed in Fev/RFP/NrxnTKO mice, the structural deficit identified by SERT-positive fiber density was moderate (< 25%) suggesting that the primary role of Nrnxns in the 5-HT system is the formation of functional components important for 5-HT release.

It is important to consider the mechanisms through which Nrnxns influence release events and the specific sites that express Nrnxns to control 5-HT neurotransmission. In the hippocampus, approximately 80% of 5-HT varicosities are extra-synaptic, while the remaining 20% form synapses (Oleskevich, Descarries, Watkins, Seguela, & Daszuta, 1991). Given the predominance of non-junctional specializations, we speculate that Nrnxns reside at 5-HT release sites that lack a direct postsynaptic target. The ability of Nrnxns to couple with release machinery triggering 5-HT vesicle exocytosis and their roles in postsynaptic differentiation at synapses are yet to be explored. Decreased SERT innervation suggests that 5-HTergic Nrnxns contribute to fiber formation, regulate the abundance of SERT itself, or that inefficient 5-HT release requires less SERT as a compensatory mechanism. Indeed, sparse pan-Nrxn deletion has been shown to blunt inferior olive neuron climbing fiber projections in the cerebellum while complete removal of Nrnxns at climbing fiber synapses did not alter climbing fiber axons but impaired synaptic transmission (Chen, Jiang, Zhang, Gokce, & Sudhof, 2017).

The observed deficits in sociability and depressive-related behaviors are relevant to ASD which often presents with co-occurring conditions. The forced swim test was performed following the tail suspension test and it is possible that Fev/RFP/NrxnTKO are more susceptible to stress rather than despair-associated coping responses. Overall, the behavioral phenotypes of Fev/RFP/NrxnTKO mice are milder than that of null Nrnxn KO mouse lines. Both  $\alpha$ Nrxn1 KO and  $\alpha$ Nrxn2 KO mice display social behavior deficits, elevated anxiety, and increased stereotypic behaviors (Born et al., 2015; Dachtler et al., 2014; Etherton, Blaiss, Powell, & Sudhof, 2009; Grayton, Missler, Collier, & Fernandes, 2013). In contrast, no abnormalities in repetitive behaviors were found in Fev/RFP/NrxnTKO mice suggesting that Nrnxn TKO in 5-HT neurons has more selective effects on 5-HT mediated behaviors.

Our results reveal that Nrnxns expressed in midbrain 5-HT neurons are important for maintaining the presynaptic molecular function of 5-HT release sites. Further investigations are necessary to decipher Nrnx-mediated 5-HT release machinery, examine the consequences of Nrnx deletion in raphe nuclei-innervated circuits in other brain regions, and address whether 5-HT therapeutics can improve behavioral deficits.

## Materials and Methods

### Animals

All experiments were conducted under approved animal protocols from the Institutional Animal Care and Use Committee (IACUC) at the University of Massachusetts Medical School. 5-HT neuron-specific tdTomato mice (Fev/RFP) were generated by crossing  $lox\text{-STOP-}lox$ tdTomato (Jax #007905) and Fev<sup>Cre</sup> mice (ePet<sup>Cre</sup>: Jax #012712) (Scott et al., 2005). Fev/RFP mice were crossed with Nrnx1<sup>ff/2<sup>ff</sup>/3<sup>ff</sup></sup> mouse line (Uchigashima, Konno, et al., 2020; T. Uemura et al., 2020) to generate 5-HT neuron-specific triple Nrnx knockout mouse line (Fev<sup>Cre</sup>/ $lox\text{-STOP-}lox$ / $lox\text{-STOP-}lox$ tdTomato/Nrnx1<sup>ff/2<sup>ff</sup>/3<sup>ff</sup></sup>: Fev/RFP/NrnxTKO). The Fev/RFP/NrnxTKO line was maintained by breeding Fev/RFP/NrnxTKO mice with Cre-negative ( $lox\text{-STOP-}lox$ tdTomato/Nrnx1<sup>ff/2<sup>ff</sup>/3<sup>ff</sup></sup>: WT) mice. Unless specified, Cre-negative littermates were used as WT controls. Male mice were used in all experiments. For social behavioral experiments, juvenile mice used as stimuli were 4- to 6- week-old male mice on a C57BL/6J background.

Mice were group housed (2-5 per cage) and maintained in ventilated cages with *ad libitum* access to food and water on a standard 12-hour light/12-hour dark cycle (lights ON at 7 A.M.) in a temperature-controlled (20-23°C) facility. One to two weeks prior to experimentation, mice were acclimated to a reversed light/dark cycle (lights ON at 7 P.M.).

### Single-cell RNA extraction and RT-qPCR

The whole procedure was done based on our recently developed protocol (Mao et al., 2018; Uchigashima, Konno, et al., 2020; Uchigashima, Leung, et al., 2020). Briefly, cytosol from RFP+ 5-HT neurons in the dorsal and median raphe nuclei were harvested from Fev/RFP and Fev/RFP/NrxnTKO mice using the whole-cell patch-clamp approach. A SMART-Seq® HT Kit (TAKARA Bio) was used to prepare the cDNA libraries following the manufacturer's instructions. Single-cell cDNA libraries were prepared by reverse transcription at 42°C for 90 min followed by PCR amplification (Uchigashima, Konno, et al., 2020; Uchigashima, Leung, et al., 2020). To assess Nrxn expression in individual 5-HT neurons of control and Fev/RFP/NrxnTKO mice, the following TaqMan gene expression assays (Applied Biosystems) were used: *Nrxn1* (Mm03808857\_m1), *Nrxn2* (Mm01236856\_m1), *Nrxn3* (Mm00553213\_m1), *Tph2* (Mm00557715\_m1) and *Gapdh* (Mm99999915\_g1). The PCR reactions and analyses were performed blind. The relative expression of *Nrxns* or *Tph2* were calculated as: Relative expression =  $2^{Ct,Gapdh}/2^{Ct,Nrxns}$  or  $2^{Ct,Tph2}$ ; Ct, threshold cycle for target gene amplification, and presented as fold changes relative to that of WT.

### Transcriptome analysis

Single-cell RNA-seq data was obtained from a recent publication (Ren et al., 2019). See Ren et al., 2019 for the single-cell isolation and sequencing (Ren et al., 2019).

*Data processing and Clustering:* Datasets were downloaded from NCBI Gene Expression Omnibus (GSE135132). Reads were aligned to mouse reference transcriptome (Mus\_musculus.GRCm38.cdna.all.fa) using kallisto (Bray et al., 2016). Tximport R package (Soneson, Love, & Robinson, 2015) was used to summarize to the gene-level. Each isoform was summarized manually to account for inclusion of spliced exons in the  $\alpha$  or  $\beta$  Nrxn isoforms. The manually curated transcript IDs are provided in **Table 1**. The gene count data was analyzed using Seurat R package v4.0.1 (Hao et al., 2021). After excluding the cells with low sequencing depth (50,000 reads) and low number of detected genes (cut-off was set at 7,500 genes), the remaining 945 cells were assigned to clusters according to the Ren et al. paper (Ren et al., 2019). Counts were normalized for each cell using the

natural logarithm of 1 + counts per 10,000 [ $\ln(1+\text{counts}/10k)$ ]. Cells were visualized using a 2-dimensional t-distributed Stochastic Neighbor Embedding (tSNE) and violin plots. The R code is provided as codeR (**Source Code File 1**).

## **Immunohistochemistry**

All mice were transcardially perfused with ice-cold 4% paraformaldehyde (PFA) / 0.1 M phosphate buffer (PB, pH 7.4) under isoflurane anesthesia. Brains were dissected and post-fixed at 4°C in PFA for 2 hours, then cryo-protected in 30% sucrose / 0.1 M PB. Coronal 40  $\mu\text{m}$ -thick brain sections were cut on a cryostat (CM3050 S, Leica Biosystems). All immunohistochemical incubations were carried out at room temperature. Sections were permeabilized for 10 min in 0.1% Tween 20 / 0.01 M phosphate-buffered saline (PBS, pH 7.4), blocked for 30 min in 10% normal donkey serum and incubated overnight in anti-SERT (guinea pig, 1  $\mu\text{g}/\text{ml}$ , Frontier Institute, HTT-GP-Af1400, RRID: AB\_2571777), anti-5-HT (goat, Abcam, ab66047, 1:1000) or anti-NeuN (mus, Millipore, MAB377, 1:1000,) antibodies. The following day, sections were washed extensively then incubated in donkey anti-guinea pig-Alexa488, goat-Alexa488, and mouse-Alexa405 antibodies for 2 hours at a dilution of 1:500 (Jackson ImmunoResearch Laboratories). Sections were then mounted on slides (ProLong Gold, Invitrogen, P36930) and viewed for acquisition and analysis.

## **SERT density analysis**

We analyzed SERT innervation to the nucleus accumbens core and shell (NAcc, NAcSh; Bregma  $1.18 \pm 0.3$  mm), stratum oriens of the CA1, CA2, and CA3 subregions of the dorsal hippocampus (dCA1, dCA2, dCA3; Bregma  $-1.46 \pm 0.4$  mm), stratum oriens of the CA1 subregion of the ventral hippocampus (vCA1;  $-3.16 \pm 0.4$  mm), and dorsal raphe nucleus (DRN; Bregma  $-4.56 \pm 0.4$  mm). To assess the density of SERT fiber inputs, four stained sections from each of three or four WT and Fev/RFP/NrxnTKO brains containing the nucleus accumbens, hippocampus, or raphe nuclei were imaged (1024 x 1024 pixels) using a laser scanning confocal microscope (LSM700, Zeiss) with a 63x oil-immersed objective (NA 1.4)

at an optical zoom of 1.6 and Zen black image acquisition software (Zeiss). For each brain, six randomly chosen 100x fields of view within the region of interest were acquired with seven z-stack steps at 0.35  $\mu\text{m}$  spacing to generate maximum intensity projections (MIPs) of the z-stacks. Images from all brains for a particular region were acquired using identical settings and data analyses were performed using ImageJ as previously described (Werneburg et al., 2020). The six images from each region per animal were averaged to generate a mean for that region in each animal, with  $n=3-4$  animals per genotype. A consistent threshold range was determined by subjecting images, blinded to genotype, to background subtraction and manual thresholding for each MIP within one experiment (IsoData segmentation method, 15-225). Using the analyze particles function, the thresholded images were used to calculate the total area of SERT fiber inputs.

### **5-HT neuron density analysis**

We analyzed the number of 5-HT-positive neurons in the DRN (Bregma  $-4.6 \pm 0.3$  mm) and MRN (Bregma  $-4.5 \pm 0.4$  mm). To assess the density of 5-HT neurons, four stained sections from each of four or five WT and Fev/RFP/NrxnTKO brains containing the DRN or MRN were imaged (1024 x 1024 pixels) using a laser scanning confocal microscope (LSM700, Zeiss) with a 20x water-immersed objective (NA 1.0) at an optical zoom of 0.5 and Zen black image acquisition software (Zeiss). Images from all brains for a particular region were acquired using identical settings and data analyses were performed using ImageJ as previously described (Uchigashima, Konno, et al., 2020).

### **Electrophysiology**

#### *Slice preparation*

Male mice were anesthetized with isoflurane and decapitated. Brains were removed and quickly cooled in ice-cold, pre-oxygenated (95%  $\text{O}_2/5\%$   $\text{CO}_2$ ) aCSF containing the following (in mM): 126 NaCl, 2.5 KCl, 1.2  $\text{NaH}_2\text{PO}_4$ , 1.2  $\text{MgCl}_2$ , 2.4  $\text{CaCl}_2$ , 25  $\text{NaHCO}_3$ , 20 HEPES, 11 D-glucose, 0.4 ascorbic acid, pH adjusted to 7.4 with NaOH. Coronal slices (400  $\mu\text{m}$ ) containing dorsal hippocampus or DRN were

prepared in ice-cold aCSF using a vibratome (VT1200 S, Leica Biosystems). Slices were recovered in oxygenated aCSF at room temperature (22-24°C) for at least 1 hour before use. Slices were then transferred to a recording chamber perfused at a rate of 1 ml/min with room temperature, oxygenated aCSF.

#### *Fast scan cyclic voltammetry*

5-HT measurements were performed in the radiatum of dorsal CA3 and DRN. All experiments and analyses were performed blind to genotype. To detect 5-HT release, carbon fiber electrodes were prepared as previously described (Hashemi, Dankoski, Petrovic, Keithley, & Wightman, 2009; Matsui & Alvarez, 2018). Carbon fiber electrodes consisted of 7- $\mu\text{m}$  diameter carbon fibers (Goodfellow) inserted into a glass pipette (A-M Systems, cat# 602500) with ~150-200  $\mu\text{m}$  of exposed fiber. The exposed carbon fibers were soaked in isopropyl alcohol for 30 min to clean the surface. Next, the exposed fibers were coated with Nafion solution (Sigma) to improve detection sensitivity by inserting the carbon fiber into Nafion solution dropped in a 3 mm diameter circle of twisted reference Ag/AgCl wire for 30 sec with constant application of +1.0 V potential. The carbon fiber electrodes were air dried for 5 min and then placed in a 70°C oven for 10 min. A modified 5-HT voltage ramp was used, in which the carbon fiber electrode was held at +0.2 V and scanned to +1.0 V, down to -0.1 V, and back to +0.2 V at 1,000 V/s delivered every 100 ms. Prior to recording, the electrodes were conditioned in aCSF with a voltage ramp delivered at 60 Hz for 10 min.

5-HT release was evoked with electrical stimulation (30 pulses, 30 Hz, 150 or 250  $\mu\text{A}$ , 1 ms) from an adjacent custom-made bipolar tungsten electrode every 10 min. The stimulating electrode was placed ~100-200  $\mu\text{m}$  away from the carbon fiber electrode (John, Budygin, Mateo, & Jones, 2006). Recordings were performed using a Chem-Clamp amplifier (Dagan Corporation) and Digidata 1550B after low-pass filter at 3 kHz and digitization at 100 kHz. Data were acquired using pClamp10 (Molecular Devices) and analyzed with custom written VIGOR software using Igor Pro 8 (32-bit; Wavemetrics) running mafPC (courtesy of M.A. Xu-Friedman). Carbon fiber electrodes were calibrated with 1  $\mu\text{M}$  5-HT (Serotonin HCl, Sigma) at the end of the experiment to convert peak current amplitude of 5-HT transients to concentration.



Three consecutive traces were averaged from each recording condition for analysis. Background subtracted peak 5-HT transients and area under the curve were determined by subtracting the current remaining after TTX (tetrodotoxin citrate, Hello Bio) application from the maximum current measured. Dopamine HCl and fluoxetine HCl were obtained from Sigma.

## **Behavioral assays**

All behavioral experiments were performed on male mice aged 8 weeks or older. Animals were habituated to the testing room for at least 30 minutes before each experiment and all tests were conducted under dim red-light conditions and white noise to maintain a constant ambient sound unless otherwise noted. All experiments and analyses were performed blind to genotype. Animals were used in only one behavioral paradigm for the direct social interaction test and fear conditioning. Mice underwent tests for locomotion, anxiety, repetitive behaviors, and depression in the following order: locomotor activity, open field, elevated plus-maze, grooming, marble burying, tail suspension test, forced swim test. At least two days of rest were given in between all tests except for the tail suspension test and forced swim test, during which mice were allowed to rest for at least 7 days in between. Another cohort of mice completed the object interaction test followed by at least 2 days of rest before undergoing rotarod. Behavioral testing apparatuses were cleaned with 0.1% Micro-90 (International Products Corporation) between each mouse. Locomotor activity: Locomotor activity of each mouse was tracked in photobeam activity chambers (San Diego Instruments) for 90 minutes. Total horizontal movement was measured in 5-minute bins.

Rotarod: Motor coordination and balance were evaluated on a rotarod apparatus (San Diego Instruments) with an accelerating rotarod test. In each trial, mice were habituated to a rod rotating at 6 rpm for 30 sec, then the rotation was increased to 60 rpm over 5 min. The latency to fall was measured over five trials with an interval of 10 min between each trial. Any mice that remained on the apparatus after 5 min were removed and their time was scored as 5 min.

Open field: Mice were placed in the center of an open arena (41 x 38 x 30.5 cm) facing the furthest wall and allowed to freely explore the arena for 10 min. Time spent in the center of the arena (20.5 x 19 cm) was automatically tracked with EthoVision XT 11.5 (Noldus).

Elevated plus-maze: The apparatus (Med Associates) consists of four arms, two enclosed with black walls (19 cm high) and two open (35 x 6 cm), connected by a central axis (6 x 6 cm) and elevated 74 cm above the floor. Mice were placed in the intersection of the maze facing the furthest open arm and allowed to freely explore the maze for 5 min. Time spent in the open and closed arms (index of anxiety-like behavior) and total entries into the open and closed arms (index of locomotor activity) were automatically measured with MED-PC IV software.

Direct social interaction test: The test was adapted from Hitti and Siegelbaum, 2014. Each mouse was placed individually into a standard mouse cage and allowed to habituate for 5 minutes followed by the introduction of a novel male juvenile mouse. The activity was monitored for 10 min and social behavior initiated by the subject mouse was measured by an experimenter sitting approximately 2 meters from the testing cage with a silenced stopwatch. Scored behaviors were described previously (Kogan, Frankland, & Silva, 2000): direct contact with the juvenile including grooming and pawing, sniffing including the anogenital area and mouth and close following (within 1 cm) of the juvenile. After 24 hours, the 10 min test was run again with the previously encountered mouse. Any aggressive encounters observed between animals led to exclusion of the subject mouse from analysis.

Tail suspension test: Mice were placed in a rectangular TST apparatus (28 x 28 x 42 cm) and suspended by their tails which were wrapped in red lab tape at around 3/4 the distance from the base. Movement was monitored for 6 min and the last 4 min were scored for immobility behavior (absence of righting attempt).

Forced swim test: Mice were placed in a plexiglass cylinder (20 cm diameter, 40 cm height) containing 22±1°C water at a depth of 20 cm to prevent them from escaping or touching the bottom. Immobility, measured as floating in the absence of movement except for those necessary to keep the head above water, was measured during the last 4 min of a 6 min session. Following the test, mice were gently dried

with a clean paper towel and placed in a fresh cage on top of a heating pad for around 10-15 minutes after which they were returned to their home cage (Yankelevitch-Yahav, Franko, Huly, & Doron, 2015).

Fear conditioning: The fear conditioning paradigm was adapted from *Herry et al.* (Herry et al., 2008). Animals were not habituated in the testing room to avoid untimely association with auditory cues. Using the ANY-maze fear conditioning system (Ugo Basile SRL), mice were placed in a fear conditioning cage (17 x 17 x 25 cm) in a sound-attenuating box. The paradigm was performed under no light conditions using two different contexts (context A and B). Mice underwent four phases with 24 hours in between each session: habituation, acquisition, auditory recall, and contextual recall. On day 1 (context A), mice were habituated to five 30 sec presentations of the CS+ and CS- (white noise) at 80 dB sound pressure level. The inter-cue interval was pseudorandomized and each session with the CS+ or CS- was 10 min. The presentation order of the CS+ and CS- trials were counterbalanced across animals. On day 2 (context A), discriminative fear conditioning was performed by pairing the CS+ with a US (1 sec foot shock, 0.75 mA, 5 CS+/US pairings; intertrial interval: 22-125 s). The onset of the US coincided with the last second of the CS+. On day 3, auditory recall was measured in context B with 5 presentations of CS+ and CS-. On day 4, the contextual recall was measured in context A for 10 min. ANY-maze software was used to analyze freezing behavior (no movement detected for 1 sec), which was scored automatically with an infrared photobeam assay in the fear conditioning cage.

Object interaction test: The test was adapted from *Molas et al.* (Molas et al., 2017). The apparatus consisted of a custom-made white Plexiglass T-shaped maze (three arms, each 9 x 29.5 x 20 cm, connected through a central 9 x 9 cm zone). Mice were placed in the start arm to habituate to the apparatus for 5 min. Following habituation, they were presented with identical inanimate objects located at opposite ends of the T-maze arms for 5 min/day on two consecutive days. On day 3, one of the inanimate objects was replaced with a novel inanimate object placed in the same location (counterbalanced) for 5 min. The preference ratio was calculated from day 3 data as: (total novel stimulus investigation – total familiar stimulus investigation) / (total investigation).

Marble burying: 15 sterilized 1.5-cm glass marbles evenly spaced 2 cm apart in three rows of five were placed in a standard mouse cage with a layer of bedding at a depth of 5-6 cm. A mouse was placed in the cage for 30 min, then returned to its home cage. The number of marbles buried (2/3 of their depth covered with bedding) was counted.

Grooming: Self-grooming behavior was scored as previously described (McFarlane et al., 2008; Yang, Zhodzishsky, & Crawley, 2007). Mice were habituated for 5 min in an empty mouse cage with no bedding, then grooming behavior was observed for 10 min by an experimenter sitting approximately 2 meters from the testing cage. Cumulative time spent grooming during the 10 min session was recorded using a silenced stopwatch.

### **Statistical analyses**

Results are represented as mean  $\pm$  SEM. Statistical significance was set at  $p < 0.05$  and evaluated using unpaired two-tailed Student's t-tests and two-way ANOVA or two-way repeated measures ANOVA with Šidák's post hoc testing for normally distributed data. Mann Whitney U tests were used for nonparametric data. Analyses were carried out with GraphPad Prism (Graphpad Software).

### **Acknowledgments**

This work was supported by grants from the National Institutes of Health (R01NS085215 to K.F., T32 GM107000 and F30MH122146 to A.C.), the Global Collaborative Research Project of Brain Research Institute, Niigata University (G2905 to K.F.), and Riccio Neuroscience Fund to K.F. The authors thank Ms. Naoe Watanabe for skillful technical assistance. We thank Drs. Veronica Alvarez, Jacqueline N Crawley, Gilles Martin, Motokazu Uchigashima, and David Weaver for comments on an earlier draft of the manuscript.

## Figure Legends

### Figure 1 *Nrxn* expression in the raphe nuclei and confirmation of *Nrxn* deletion in *Fev/RFP/NrxnTKO* mice.

Single-cell transcriptomic analysis of *Nrxn* expression in DRN, cDRN, and MRN 5-HT neurons. **(A)** Single-cell t-SNE plot of 999 *Tph2*-positive neurons representing 5-HT neurons analyzed from a recent publication (Ren et al., 2019). 11 transcriptomic clusters were correlated with anatomical location. DRN, cDRN, and MRN 5-HT neurons have six, one, and four different subclusters, respectively. **(B)** Single-cell t-SNE plots for the expression of six *Nrxn* isoforms in distinct 5-HT neuron populations. Cells are colored by log-normalized expression of each transcript, and the color legend reflects the expression values of  $\ln(\text{CPM}+1)$ . **(C)** Violin plots of six *Nrxn* splice isoforms in 11 clusters. Although there are cluster-dependent *Nrxn* expression patterns (e.g.,  $\alpha$  and  $\beta$ *Nrxn3* expression in MRN4), each *Nrxn* isoform is expressed in cells across all clusters. **(D)** Validation of the *Fev/RFP/NrxnTKO* mouse line. Expression of *Nrxn* genes in tdTomato-positive 5-HT neurons were compared between *Fev/RFP* (WT) and *Fev/RFP/NrxnTKO* mice. qPCRs against *Nrxn 1, 2, 3*, *Tph2*, and *Gapdh* (internal control) were performed for single-cell cDNA libraries prepared from tdTomato-positive neurons. Number of neurons: *Fev/RFP* (n = 23 neurons, 4 mice) and *Fev/RFP/NrxnTKO* (22, 4). Data are reported as mean  $\pm$  SEM. n.s., not significant, \*  $p < 0.05$ , \*\*\*  $p < 0.001$ , \*\*\*\*  $p < 0.0001$ ; Mann-Whitney U test. Scale bars, 20  $\mu\text{m}$ .

### Figure 2 The lack of *Nrxns* in 5-HT neurons reduces evoked 5-HT release in the dorsal raphe nucleus and hippocampus.

**(A)** Voltage ramp protocol for detecting 5-HT with FSCV. Rapid cycling (2.2 ms) of the voltage ramp produced a current based on voltage-dependent oxidation (blue, oxi) and reduction (red) representing real-time 5-HT release. **(B)** Representative current traces when measuring 5-HT (1  $\mu\text{M}$ , blue) or dopamine (DA; 1  $\mu\text{M}$ , orange) using carbon-fiber microelectrodes calibrated on a 5-HT voltage ramp. Insets: Background-subtracted CV plots of the electrochemical current when 5-HT (left) or DA (right) was

applied. **(C, D)** Electrically evoked 5-HT transients detected in the dorsal raphe nucleus (DRN) of WT ( $n = 6$  slices, 3 mice) **(C)** and Fev/RFP/NrxnTKO (6, 3) **(D)** mice during perfusion with aCSF (left), SERT blocker fluoxetine (FLX, 10  $\mu$ M, middle), and action potential-blocking TTX (1  $\mu$ M, right). Top: representative CV plots of the electrochemical current in aCSF, FLX, and TTX. Middle: average 5-HT transients under each condition. Bottom: background-subtracted 3D voltammograms (false color scale) as a function of time (x axis, 20 s) and voltage applied (y axis). Note that TTX completely abolished peak transients indicating that FSCV measurements were mediated by action potential-induced 5-HT release. The expected oxidation peaks for 5-HT in the CV plots acquired from WT and Fev/RFP/NrxnTKO mice were similar. FLX application prolonged 5-HT transient area which verified that the FSCV transients detected 5-HT signals. WT and Fev/RFP/NrxnTKO mice showed similar responses to FLX. **(E)** Peak amplitude of 5-HT transients evoked using a 150  $\mu$ A or 250  $\mu$ A stimulation train (30 pulses, 30 Hz, 1 ms) in the DRN of WT (gray) and Fev/RFP/NrxnTKO (green) mice. 5-HT release was significantly different between genotypes (two-way repeated measures ANOVA: genotype main effect,  $F_{1,10} = 12.02$ ,  $^{##} p = 0.006$ ; stimulation strength main effect,  $F_{1,10} = 26.89$ ,  $p = 0.0004$ ; stimulus strength x genotype interaction,  $F_{1,10} = 1.936$ ,  $p = 0.2648$ ). **(F)** Normalized area of 5-HT transients recorded in the DRN before and after FLX application. 5-HT transient area before and after FLX was significantly different (two-way repeated measures ANOVA: drug main effect,  $F_{1,10} = 63.88$ ,  $^{####} p < 0.0001$ ; genotype main effect,  $F_{1,10} = 0.004378$ ,  $p = 0.9486$ ; drug x genotype interaction,  $F_{1,10} = 0.1492$ ,  $p = 0.7074$ ). **(G, H)** Electrically evoked 5-HT transients detected in the hippocampus of WT ( $n = 3$ ) **(G)** and Fev/RFP/NrxnTKO ( $n = 3$ ) **(H)** mice during perfusion with aCSF (left), SERT blocker FLX (10  $\mu$ M, middle), and action potential-blocking TTX (1  $\mu$ M, right). Top: representative CV plots of the electrochemical current in aCSF, FLX, and TTX. Middle: average 5-HT transients under each condition. Bottom: background-subtracted 3D voltammograms (false color scale) as a function of time (x axis, 20 s) and voltage applied (y axis). **(I)** Peak amplitude of 5-HT transients evoked using a 150  $\mu$ A or 250  $\mu$ A stimulation train in the hippocampus of WT and Fev/RFP/NrxnTKO mice. 5-HT release at each stimulation strength was significantly different between groups (two-way repeated measures ANOVA with Šidák's post hoc test following significant stimulation

strength x genotype interaction,  $F_{1,9} = 6.982$ ,  $p = 0.0268$ ; stimulation strength main effect,  $F_{1,9} = 11.24$ ,  $p = 0.0085$ ; genotype main effect,  $F_{1,9} = 24.56$ ,  $p = 0.0008$ ). (J) Normalized area of 5-HT transients recorded in the hippocampus before and after FLX application. No differences in 5-HT transient area before and after FLX were found between groups (two-way repeated measures ANOVA: drug main effect,  $F_{1,9} = 3.711$ ,  $p = 0.0862$  genotype main effect,  $F_{1,9} = 0.01351$ ,  $p = 0.91$ ; drug x genotype interaction,  $F_{1,9} = 0.09308$ ,  $p = 0.7672$ ). \*  $p < 0.05$ , \*\*\*\*  $p < 0.0001$ ; WT vs. Fev/RFP/NrxnTKO: ##  $p < 0.01$ ; aCSF vs. FLX: ####  $p < 0.0001$ .

**Figure 3 The absence of Nrxns in 5-HT neurons decreases 5-HT fiber density in specific brain regions.**

(A-G) Representative 100x images of SERT-positive fibers in the nucleus accumbens core (NAcc) (A), nucleus accumbens shell (NAcSh) (B), dorsal hippocampal CA1-3 subregions (dCA1, 2, 3) (C-E), ventral hippocampal CA1 (vCA1) (F), and dorsal raphe nucleus (DRN) (G). The images are maximum intensity projections of 21 z-stacks across a 7  $\mu\text{m}$  z-depth using 0.35  $\mu\text{m}$  z-steps. (H) Quantification of the area of SERT-positive fibers revealed that 5-HT innervation was altered in specific brain regions in mice lacking Nrxns ( $n = 3-4$  mice/genotype; for each mouse, 6 fields of view were averaged for each region). \*  $p < 0.05$ ; unpaired two-tailed Student's t-test. Scale bars, 10  $\mu\text{m}$ .

**Figure 4 The absence of Nrxns in 5-HT neurons impairs social behavior.** (A) Direct social interaction test using the same juvenile stimulus across two trials. (B) WT (gray,  $n = 13$ ) and Fev/RFP/NrxnTKO (green,  $n = 13$ ) mice differed in their investigation of the juvenile stimulus across the two trials. Both groups spent less time exploring the juvenile stimulus during trial 2 than in trial 1 (two-way repeated measures ANOVA: trial main effect,  $F_{1,24} = 7.855$ , ##  $p = 0.0099$ ; genotype main effect,  $F_{1,24} = 2.086$ ,  $p = 0.1616$ ; significant trial x genotype interaction,  $F_{1,24} = 4.344$ ,  $p = 0.0479$ ). Šidák's post hoc test identified a significant genotype difference in investigation time in Trial 1 (\*\*  $p = 0.0041$ ). (C) The difference score of the interaction time across trials was reduced in Fev/RFPNrxnTKO mice (unpaired two-tailed Student's



t-test:  $t_{24} = 2.084$ , \*  $p = 0.0479$ ). **(D)** *Left*, Fev/RFP/NrxnTKO mice displayed increased immobile time compared with WT in the forced swim test (unpaired two-tailed Student's t-test:  $t_{22} = 2.317$ , \*  $p = 0.0302$ ). *Right*, no difference in the number of immobile episodes was observed (unpaired two-tailed Student's t-test:  $t_{22} = 1.301$ ,  $p = 0.2068$ ). **(E)** *Left*, WT ( $n = 12$ ) and Fev/RFP/NrxnTKO ( $n = 12$ ) mice showed no difference in time immobile in the tail suspension test (unpaired two-tailed Student's t-test:  $t_{22} = 1.070$ ,  $p = 0.2964$ ). *Right*, there was no difference between genotypes in the number of immobile episodes (unpaired two-tailed Student's t-test:  $t_{22} = 1.001$ ,  $p = 0.3279$ ).

### **Figure 3-figure supplement 1. Nrxn-deficient does not cause cell death in 5-HT neurons.**

**(A-D)** Images of double-labeled immunofluorescence staining against 5-HT (green) and NeuN (blue) in the MRN and DRN of WT **(A)** and Fev/RFP/NrxnTKO **(B)** mice. **(C)** The relative proportion of DRN or MRN 5-HT neurons as a fraction of neuronal populations positive for anti-5-HT antibody positive and NeuN positive cells. Number of mice: 5 for each genotype. n.s.: not significant. Unpaired two-tailed Student's t-test. Scale bars, 100  $\mu\text{m}$ .

### **Figure 4-Figure Supplement 1. 5-HT neuron-specific Nrxn TKO does not cause abnormal basic activities.**

**(A)** *Left*, WT ( $n = 12$ ) and Fev/RFP/NrxnTKO ( $n = 12$ ) mice showed no differences in horizontal locomotor activity (two-way repeated measures ANOVA: genotype main effect,  $F_{1,22} = 0.4666$ ,  $p = 0.5017$ ; time x genotype interaction,  $F_{17,374} = 0.9467$ ,  $p = 0.5188$ ). *Right*, cumulative locomotor activity did not differ between WT and Fev/RFP/NrxnTKO mice over the 90 min period (unpaired two-tailed Student's t-test:  $t_{22} = 0.6831$ ,  $p = 0.5017$ ). **(B)** WT ( $n = 16$ ) and Fev/RFP/NrxnTKO ( $n = 13$ ) mice showed no differences in latency to fall over 5 trials of accelerating rotarod (two-way repeated measures ANOVA: genotype main effect,  $F_{1,27} = 0.2204$ ,  $p = 0.6425$ ; trial x genotype interaction,  $F_{4,108} = 0.2161$ ,  $p = 0.929$ ; trial main effect:  $F(2.943,79.47) = 37.52$ ,  $p < 0.0001$ ). **(C)** *Left*, WT ( $n = 12$ ) and Fev/RFP/NrxnTKO ( $n = 12$ ) mice showed no differences in time spent in the center of the open field arena (unpaired two-tailed Student's t-test:  $t_{22}$



= 0.04652,  $p = 0.9633$ ). *Right*, there were no differences for the distance traveled during open field (unpaired two-tailed Student's t-test:  $t_{22} = 0.1053$ ,  $p = 0.9171$ ). **(D) Left**, the time WT ( $n = 12$ ) and Fev/RFP/NrxnTKO ( $n = 12$ ) mice spent in the open arms during the elevated-plus maze was similar between genotypes (unpaired two-tailed Student's t-test:  $t_{22} = 1.158$ ,  $p = 0.2592$ ). *Right*, WT ( $n = 12$ ) and Fev/RFP/NrxnTKO ( $n = 12$ ) mice both demonstrated similar total arm entries (unpaired two-tailed Student's t-test:  $t_{22} = 0.3625$ ,  $p = 0.7204$ ). n.s.: not significant.

**Figure 4-Figure Supplement 2. 5-HT neuron-specific Nrxn TKO mice display normal learning and memory and repetitive behaviors.**

**(A)** Protocol for fear conditioning. Fear conditioning was performed over four days. Mice were presented with two different auditory cues, one paired (yellow speaker) with a foot shock (yellow thunderbolt) and one unpaired (green speaker). ITI: intertrial interval. **(B)** WT ( $n = 14$ ) and Fev/RFP/NrxnTKO ( $n = 11$ ) mice both showed differences in freezing behavior across the presentations associated with the foot shock (CS+) (two-way repeated measures ANOVA: stimulus main effect,  $F_{2,607,59.97} = 45.06$ , #####  $p < 0.0001$ ). No differences were seen between groups (two-way repeated measures ANOVA: genotype main effect,  $F_{1,23} = 0.00339$ ,  $p = 0.9541$ ; stimulus x genotype interaction,  $F_{4,92} = 0.2652$ ,  $p = 0.8996$ ). **(C)** Among WT and Fev/RFP/NrxnTKO, freezing to the CS+ was increased relative to the CS- (stimulus with no association between auditory cue and foot shock) (two-way repeated measures ANOVA: stimulus main effect,  $F_{1,23} = 85.22$ , #####  $p < 0.0001$ ), but no differences were detected between groups (two-way repeated measures ANOVA: genotype main effect,  $F_{1,23} = 1.67$ ,  $p = 0.2091$ ; stimulus x genotype interaction,  $F_{1,23} = 0.03121$ ,  $p = 0.8613$ ). **(D)** Fev/RFP/NrxnTKO mice showed no altered freezing behavior during contextual recall (unpaired two-tailed Student's t-test:  $t_{23} = 0.01457$ ,  $p = 0.9885$ ). **(E)** Protocol for object interaction test. **(F)** WT ( $n = 15$ ) and Fev/RFP/NrxnTKO ( $n = 12$ ) showed no preference for identical objects on day 1 (two-way repeated measures ANOVA: stimulus main effect,  $F_{1,25} = 2.606$ ,  $p = 0.119$ ; genotype main effect,  $F_{1,25} = 0.02422$ ,  $p = 0.8776$ ; stimulus x genotype interaction,  $F_{1,25} =$

0.1923,  $p = 0.6648$ ) and day 2 (two-way repeated measures ANOVA: stimulus main effect,  $F_{1,25} = 3.18$ ,  $p = 0.0867$ ; genotype main effect,  $F_{1,25} = 0.27$ ,  $p = 0.6079$ ; stimulus x genotype interaction,  $F_{1,25} = 0.1825$ ,  $p = 0.6729$ ) and preferred the novel object over the familiar object on day 3 (two-way repeated measures ANOVA: stimulus main effect,  $F_{1,25} = 129.6$ ,  $p < 0.0001$ ; genotype main effect,  $F_{1,25} = 0.1452$ ,  $p = 0.7064$ ; stimulus x genotype interaction,  $F_{1,25} = 0.03164$ ,  $p = 0.8603$ ). **(G)** The preference ratio for the objects differed across days (two-way repeated measures ANOVA: day main effect,  $F_{1,932,48.3} = 47.7$ ,  $p < 0.0001$ ), but no differences were seen between groups (two-way repeated measures ANOVA: genotype main effect,  $F_{2,50} = 0.008519$ ,  $p = 0.9272$ ; day x genotype interaction,  $F_{2,50} = 0.1781$ ,  $p = 0.8374$ ). **(H)** WT ( $n = 12$ ) and *Fev/RFP/NrxnTKO* ( $n = 12$ ) mice showed no differences in the number of marbles buried (unpaired two-tailed Student's t-test:  $t_{22} = 1.491$ ,  $p = 0.1502$ ). **(I)** *Left*, no differences in grooming time were observed between groups (unpaired two-tailed Student's t-test:  $t_{22} = 0.04104$ ,  $p = 0.9676$ ). *Right*, the number of grooming episodes was similar between groups (unpaired two-tailed Student's t-test:  $t_{22} = 0.5443$ ,  $p = 0.5917$ ).

## References

- Awasthi, J. R., Tamada, K., Overton, E. T. N., & Takumi, T. (2021). Comprehensive topographical map of the serotonergic fibers in the male mouse brain. *J Comp Neurol*, 529(7), 1391-1429. doi:10.1002/cne.25027
- Belmer, A., Klenowski, P. M., Patkar, O. L., & Bartlett, S. E. (2017). Mapping the connectivity of serotonin transporter immunoreactive axons to excitatory and inhibitory neurochemical synapses in the mouse limbic brain. *Brain Struct Funct*, 222(3), 1297-1314. doi:10.1007/s00429-016-1278-x
- Born, G., Grayton, H. M., Langhorst, H., Dudanova, I., Rohlmann, A., Woodward, B. W., . . . Missler, M. (2015). Genetic targeting of NRXN2 in mice unveils role in excitatory cortical synapse function and social behaviors. *Front Synaptic Neurosci*, 7, 3. doi:10.3389/fnsyn.2015.00003
- Carboni, E., & Di Chiara, G. (1989). Serotonin release estimated by transcortical dialysis in freely-moving rats. *Neuroscience*, 32(3), 637-645. doi:10.1016/0306-4522(89)90285-6
- Chen, L. Y., Jiang, M., Zhang, B., Gokce, O., & Sudhof, T. C. (2017). Conditional Deletion of All Neurexins Defines Diversity of Essential Synaptic Organizer Functions for Neurexins. *Neuron*, 94(3), 611-625 e614. doi:10.1016/j.neuron.2017.04.011
- Dachtler, J., Glasper, J., Cohen, R. N., Ivorra, J. L., Swiffen, D. J., Jackson, A. J., . . . Clapcote, S. J. (2014). Deletion of alpha-neurexin II results in autism-related behaviors in mice. *Transl Psychiatry*, 4, e484. doi:10.1038/tp.2014.123
- Etherton, M. R., Blaiss, C. A., Powell, C. M., & Sudhof, T. C. (2009). Mouse neurexin-1alpha deletion causes correlated electrophysiological and behavioral changes consistent with cognitive impairments. *Proc Natl Acad Sci U S A*, 106(42), 17998-18003. doi:10.1073/pnas.0910297106
- Grayton, H. M., Missler, M., Collier, D. A., & Fernandes, C. (2013). Altered social behaviours in neurexin 1alpha knockout mice resemble core symptoms in neurodevelopmental disorders. *PLoS One*, 8(6), e67114. doi:10.1371/journal.pone.0067114
- Hao, Y., Hao, S., Andersen-Nissen, E., Mauck, W. M., 3rd, Zheng, S., Butler, A., . . . Satija, R. (2021). Integrated analysis of multimodal single-cell data. *Cell*, 184(13), 3573-3587 e3529. doi:10.1016/j.cell.2021.04.048
- Hashemi, P., Dankoski, E. C., Petrovic, J., Keithley, R. B., & Wightman, R. M. (2009). Voltammetric detection of 5-hydroxytryptamine release in the rat brain. *Anal Chem*, 81(22), 9462-9471. doi:10.1021/ac9018846
- Herry, C., Ciocchi, S., Senn, V., Demmou, L., Muller, C., & Luthi, A. (2008). Switching on and off fear by distinct neuronal circuits. *Nature*, 454(7204), 600-606. doi:10.1038/nature07166
- John, C. E., Budygin, E. A., Mateo, Y., & Jones, S. R. (2006). Neurochemical characterization of the release and uptake of dopamine in ventral tegmental area and serotonin in substantia nigra of the mouse. *J Neurochem*, 96(1), 267-282. doi:10.1111/j.1471-4159.2005.03557.x
- Kogan, J. H., Frankland, P. W., & Silva, A. J. (2000). Long-term memory underlying hippocampus-dependent social recognition in mice. *Hippocampus*, 10(1), 47-56. doi:10.1002/(SICI)1098-1063(2000)10:1<47::AID-HIPO5>3.0.CO;2-6
- Lesch, K. P., & Waider, J. (2012). Serotonin in the modulation of neural plasticity and networks: implications for neurodevelopmental disorders. *Neuron*, 76(1), 175-191. doi:10.1016/j.neuron.2012.09.013
- Mao, W., Salzberg, A. C., Uchigashima, M., Hasegawa, Y., Hock, H., Watanabe, M., . . . Futai, K. (2018). Activity-Induced Regulation of Synaptic Strength through the Chromatin Reader L3mbtl1. *Cell Rep*, 23(11), 3209-3222. doi:10.1016/j.celrep.2018.05.028

- Matsui, A., & Alvarez, V. A. (2018). Cocaine Inhibition of Synaptic Transmission in the Ventral Pallidum Is Pathway-Specific and Mediated by Serotonin. *Cell Rep*, 23(13), 3852-3863. doi:10.1016/j.celrep.2018.05.076
- McFarlane, H. G., Kusek, G. K., Yang, M., Phoenix, J. L., Bolivar, V. J., & Crawley, J. N. (2008). Autism-like behavioral phenotypes in BTBR T+tf/J mice. *Genes Brain Behav*, 7(2), 152-163. doi:10.1111/j.1601-183X.2007.00330.x
- Molas, S., Zhao-Shea, R., Liu, L., DeGroot, S. R., Gardner, P. D., & Tapper, A. R. (2017). A circuit-based mechanism underlying familiarity signaling and the preference for novelty. *Nat Neurosci*, 20(9), 1260-1268. doi:10.1038/nn.4607
- Oleskevich, S., Descarries, L., Watkins, K. C., Seguela, P., & Daszuta, A. (1991). Ultrastructural features of the serotonin innervation in adult rat hippocampus: an immunocytochemical description in single and serial thin sections. *Neuroscience*, 42(3), 777-791. doi:10.1016/0306-4522(91)90044-o
- Ren, J., Isakova, A., Friedmann, D., Zeng, J., Grutzner, S. M., Pun, A., . . . Luo, L. (2019). Single-cell transcriptomes and whole-brain projections of serotonin neurons in the mouse dorsal and median raphe nuclei. *Elife*, 8. doi:10.7554/eLife.49424
- Scott, M. M., Wylie, C. J., Lerch, J. K., Murphy, R., Lobur, K., Herlitze, S., . . . Deneris, E. S. (2005). A genetic approach to access serotonin neurons for in vivo and in vitro studies. *Proc Natl Acad Sci U S A*, 102(45), 16472-16477. doi:10.1073/pnas.0504510102
- Soneson, C., Love, M. I., & Robinson, M. D. (2015). Differential analyses for RNA-seq: transcript-level estimates improve gene-level inferences. *F1000Res*, 4, 1521. doi:10.12688/f1000research.7563.2
- Sudhof, T. C. (2017). Synaptic Neurexin Complexes: A Molecular Code for the Logic of Neural Circuits. *Cell*, 171(4), 745-769. doi:10.1016/j.cell.2017.10.024
- Uchigashima, M., Konno, K., Demchak, E., Cheung, A., Watanabe, T., Keener, D. G., . . . Futai, K. (2020). Specific Neuroligin3- $\alpha$ Neurexin1 signaling regulates GABAergic synaptic function in mouse hippocampus. *Elife*, 9. doi:10.7554/eLife.59545
- Uchigashima, M., Leung, M., Watanabe, T., Cheung, A., Le, T., Pallat, S., . . . Futai, K. (2020). Neuroligin3 splice isoforms shape inhibitory synaptic function in the mouse hippocampus. *J Biol Chem*, 295(25), 8589-8595. doi:10.1074/jbc.AC120.012571
- Uemura, T., Suzuki, E., Kawase, S., Kurihara, T., Yasumura, M., Yoshida, T., . . . Tabuchi, K. (2020). Neurexins play a crucial role in cerebellar granule cell survival by organizing autocrine machinery for neurotrophins *Submitted*.
- Uemura, T., Suzuki, E., Kawase, S., Kurihara, T., Yasumura, M., Yoshida, T., . . . Tabuchi, K. (2021). Neurexins play a crucial role in cerebellar granule cell survival by organizing autocrine machinery for neurotrophins. *Submitted*, . doi:doi: <https://doi.org/10.1101/2020.11.14.383158>
- Uemura, T., Suzuki, E., Koike, R., Kawase, S., Kurihara, T., Sakimura, K., Mishina, M., Tabuchi, K. (2017). Generation and analysis of cerebellar granule cell-specific neurexins triple knockout mice. *The Japan Neuroscience Society, Neuro2017*, 20-10e12-14.
- Werneburg, S., Jung, J., Kunjamma, R. B., Ha, S. K., Luciano, N. J., Willis, C. M., . . . Schafer, D. P. (2020). Targeted Complement Inhibition at Synapses Prevents Microglial Synaptic Engulfment and Synapse Loss in Demyelinating Disease. *Immunity*, 52(1), 167-182 e167. doi:10.1016/j.immuni.2019.12.004
- Yang, M., Zhodzishsky, V., & Crawley, J. N. (2007). Social deficits in BTBR T+tf/J mice are unchanged by cross-fostering with C57BL/6J mothers. *Int J Dev Neurosci*, 25(8), 515-521. doi:10.1016/j.ijdevneu.2007.09.008

Yankelevitch-Yahav, R., Franko, M., Huly, A., & Doron, R. (2015). The forced swim test as a model of depressive-like behavior. *J Vis Exp*(97). doi:10.3791/52587

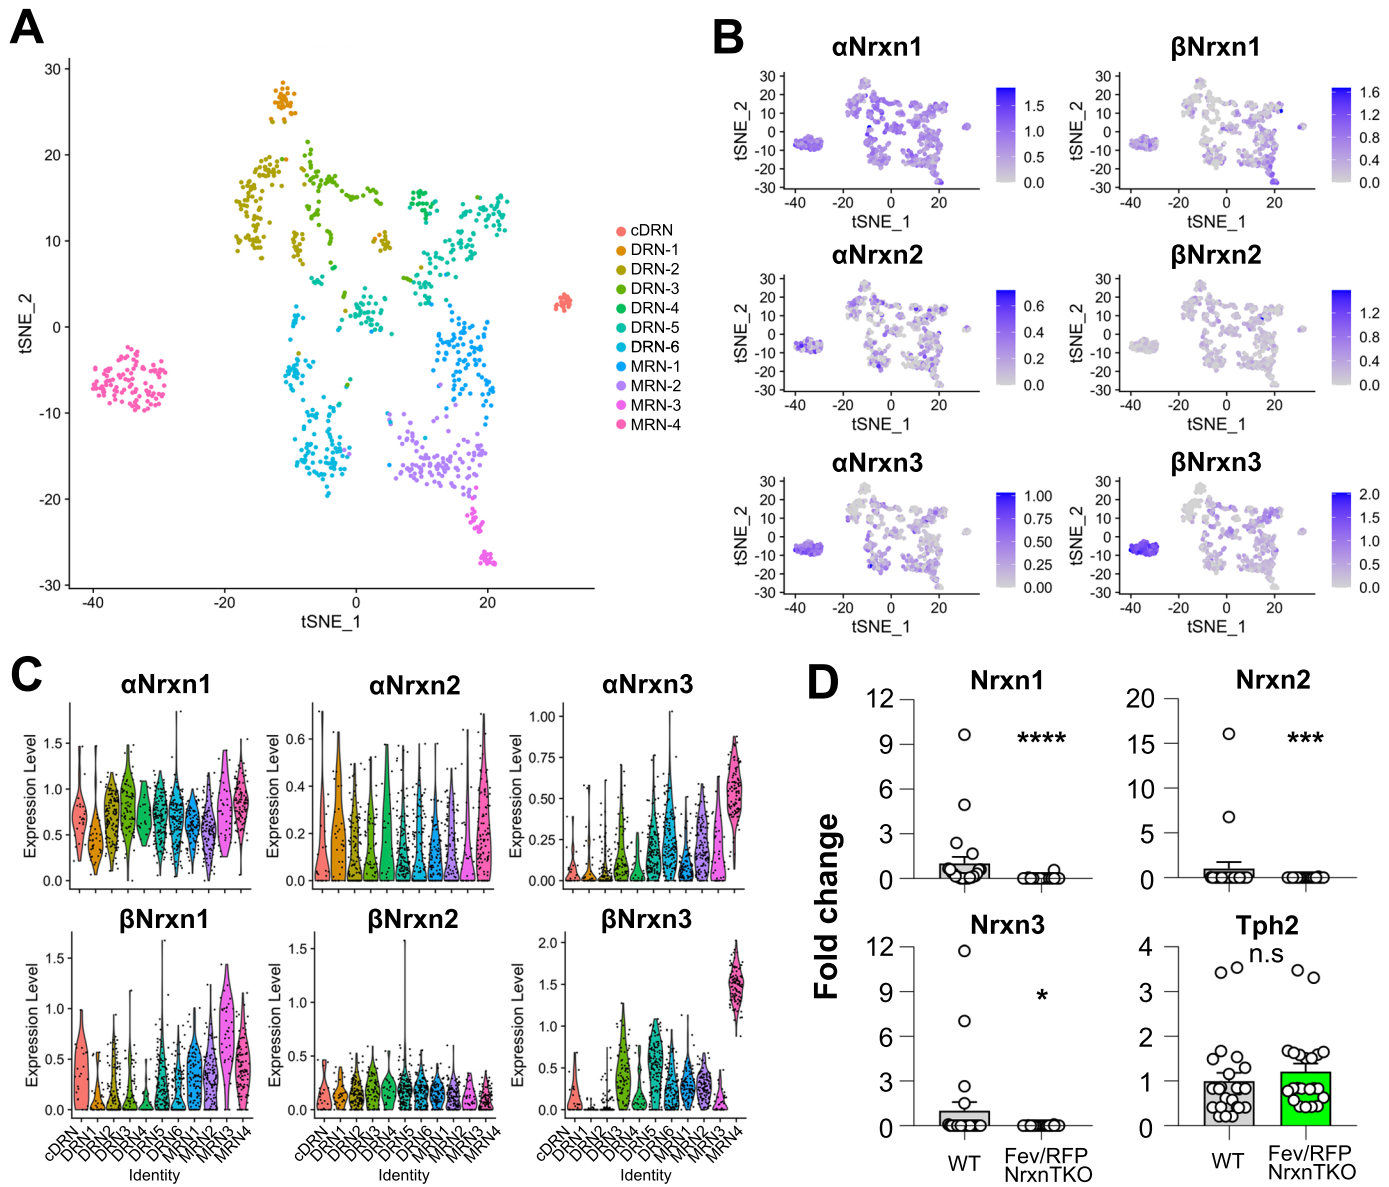

Figure 1



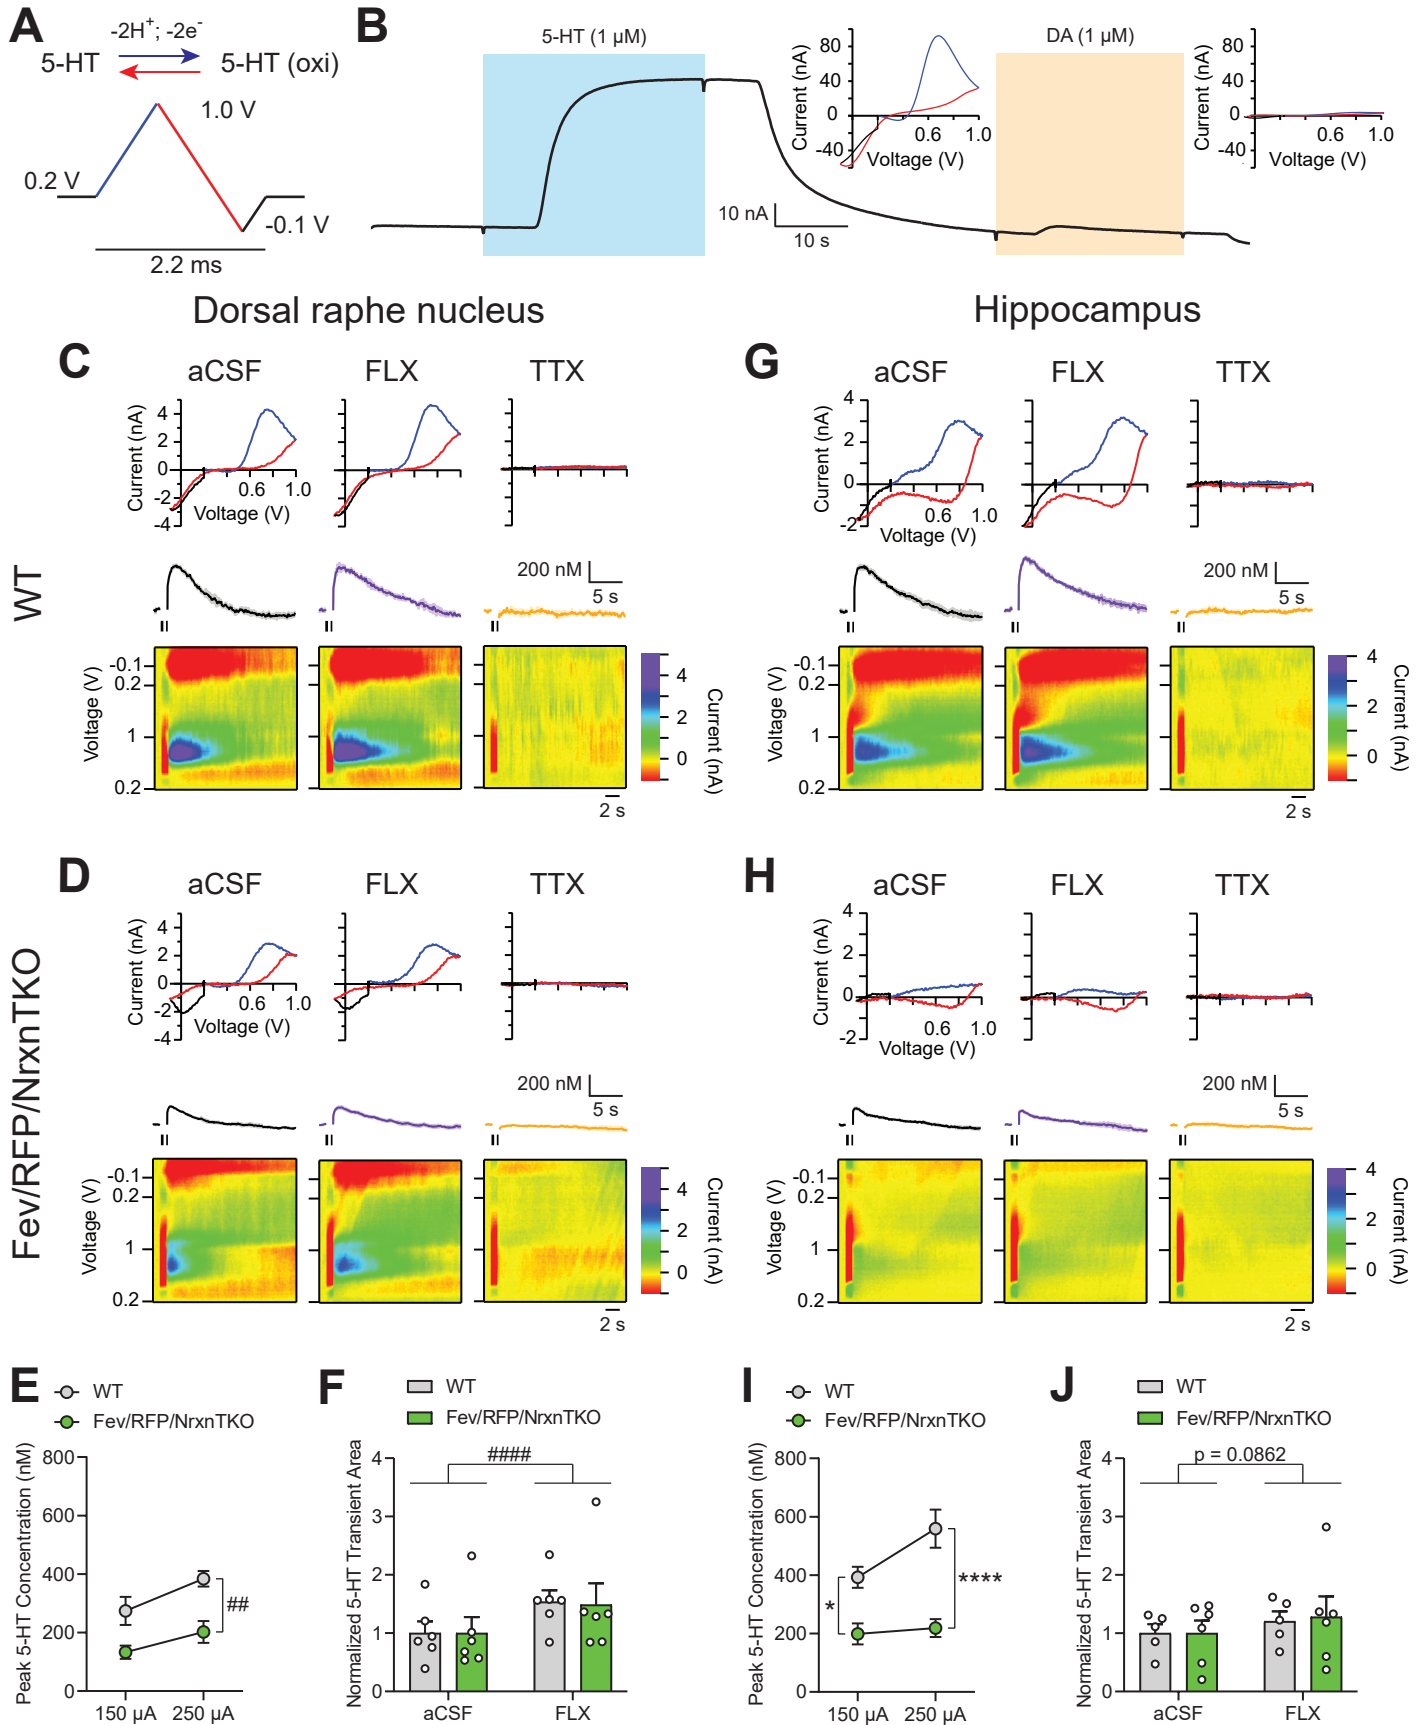

Figure 2

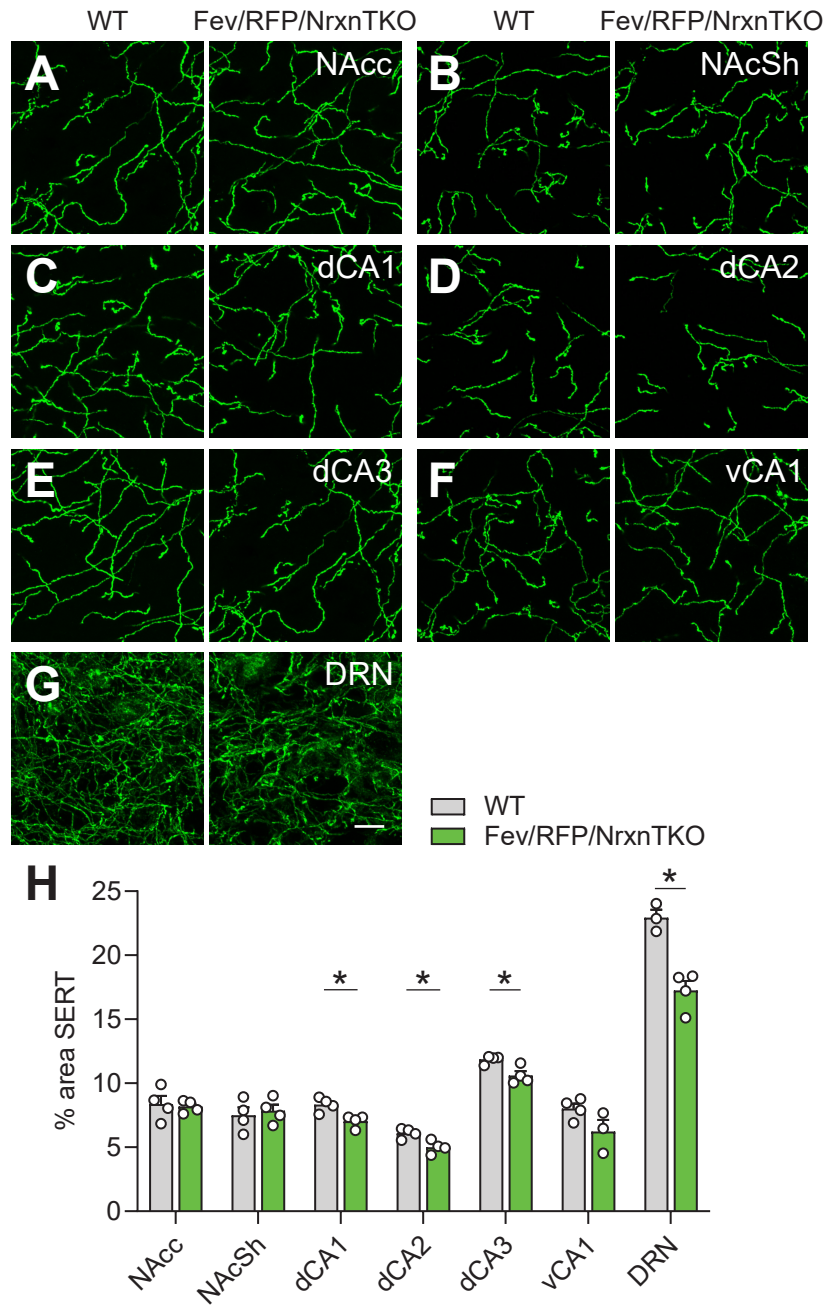

Figure 3



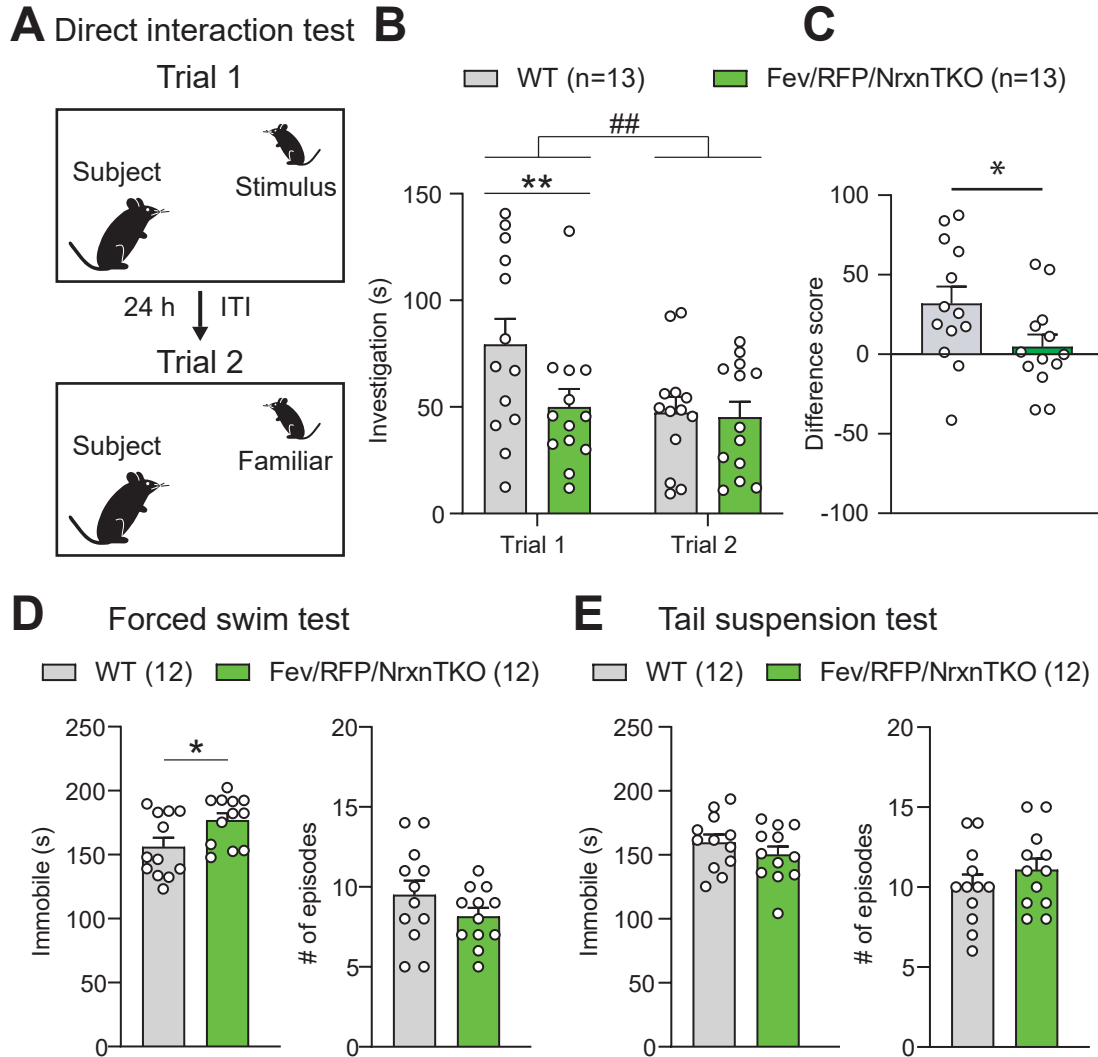

Figure 4

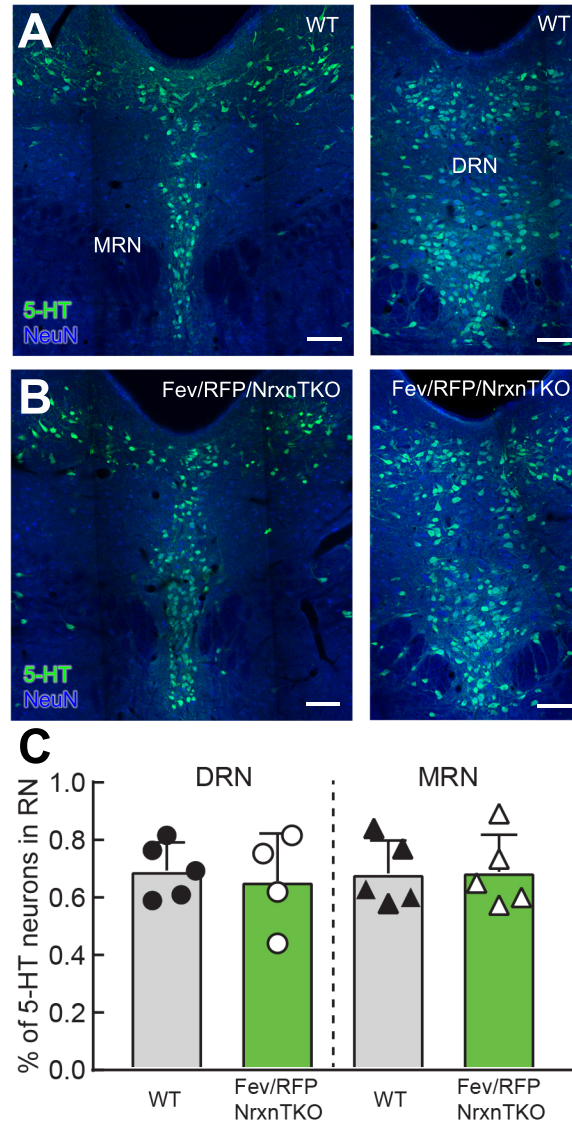

Figure 3-Figure Supplement 1

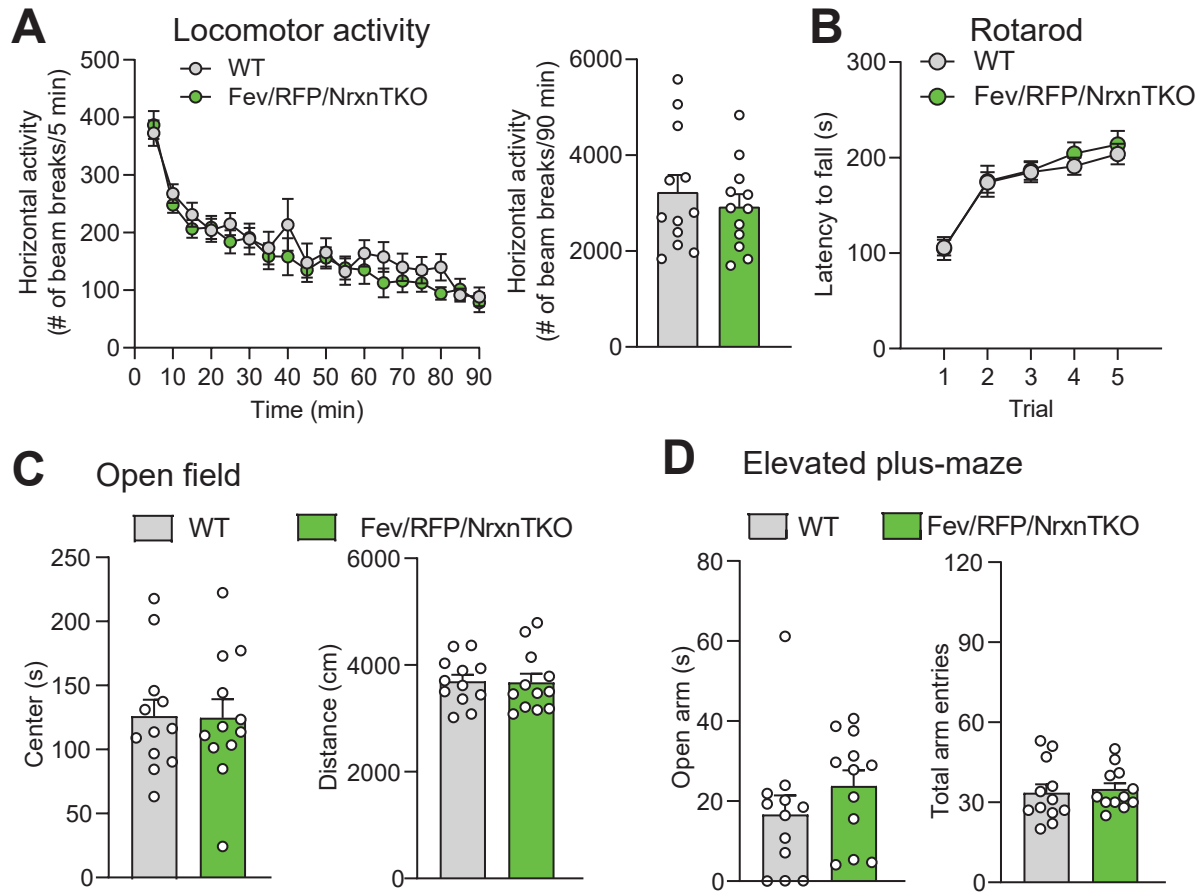

Figure 4-Figure Supplement 1

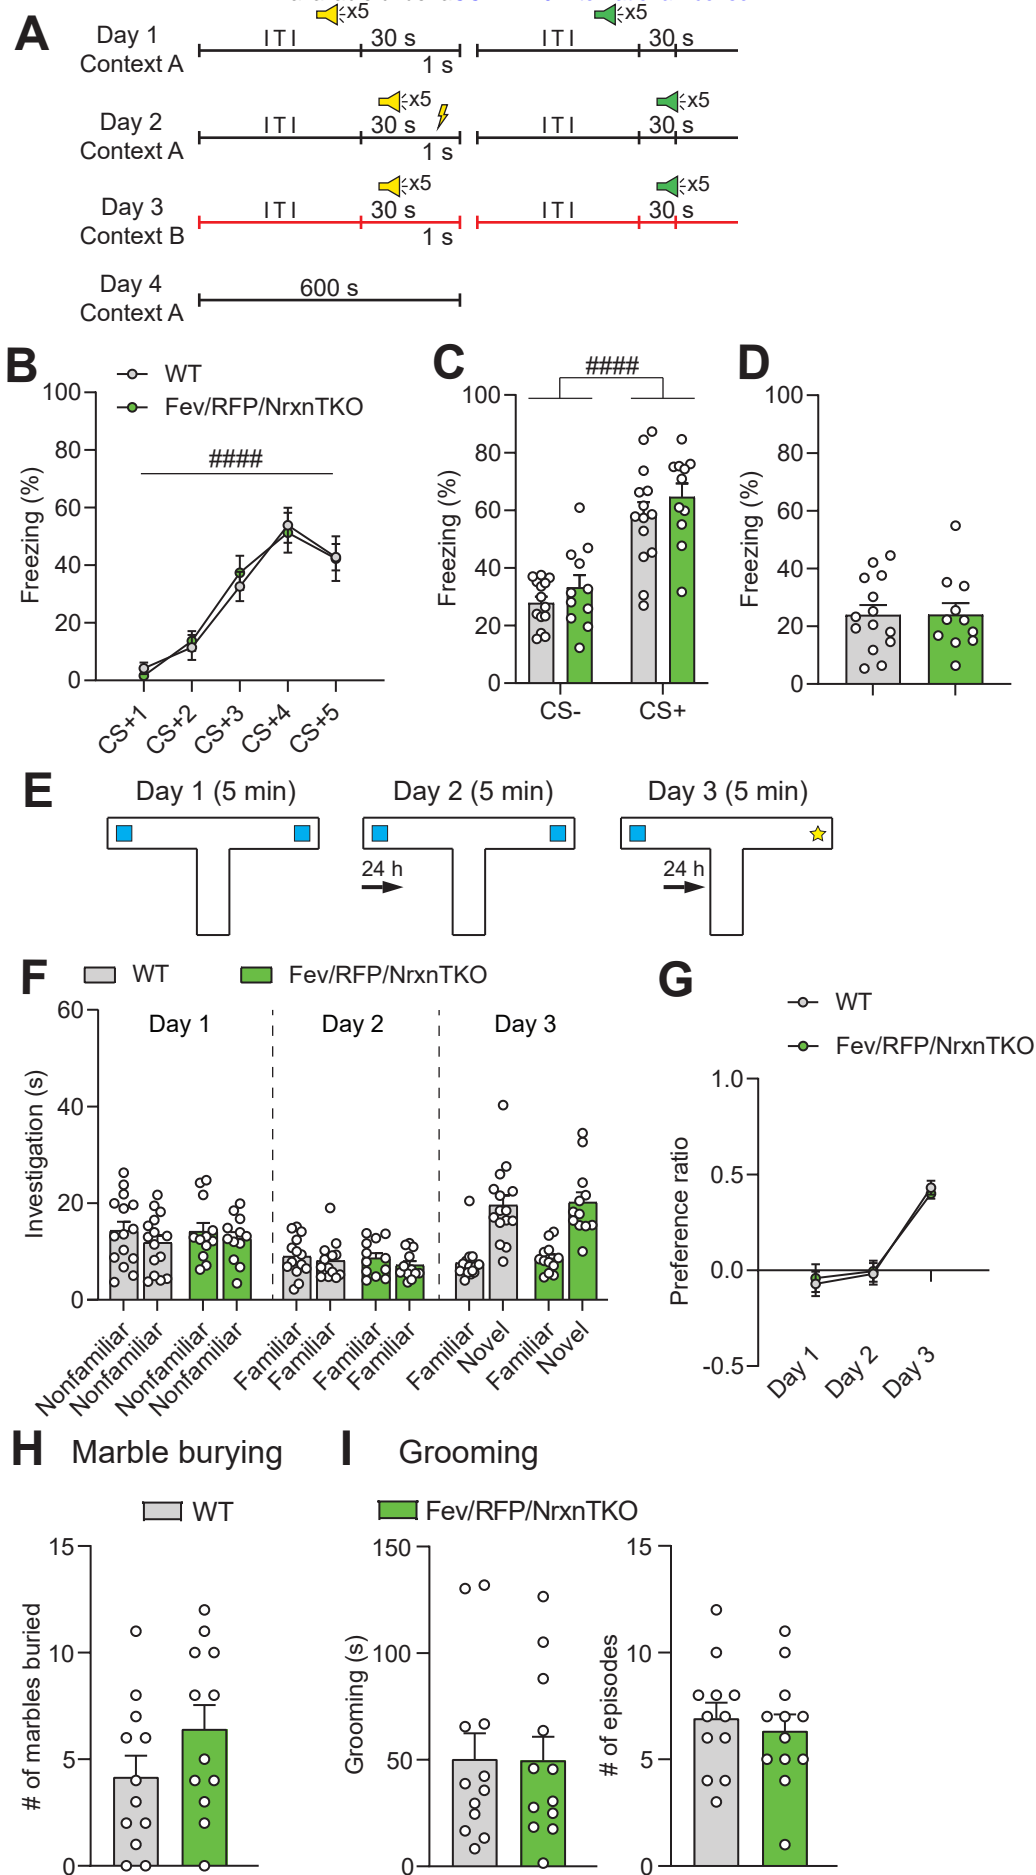

Figure 4-Figure Supplement 2
